# Supplementary material for: Spatial differentiation of the leaf area index in forests in ecological transition zones and its environmental response
Source: Springer Nature journal article supplement (doi:10.1007/s10342-024-01682-0), 2024-04-30
Supplement: 10342_2024_1682_MOESM1_ESM.pdf [file 10342_2024_1682_MOESM1_ESM.pdf]

# **Spatial differentiation of the leaf area index in forests in ecological transition zones and its environmental response**

Geyang Li<sup>1</sup>, Chengzhang Zhao<sup>1\*</sup>, Dingyue Liu<sup>1</sup>, Lei Lin<sup>2</sup>, Chenglu Huang<sup>1</sup>, Peixian Zhang<sup>1</sup>, Suhong Wang<sup>1</sup>, Xianshi Wu<sup>1</sup>

1. Gansu Province Wetland Resources Protection and Industrial Development Engineering Research Center, College of Geography and Environmental Sciences, Northwest Normal University, Lanzhou Gansu 730100, China

2. Xinglongshan Forest Ecosystem National Positioning Observation and Research Station, Lanzhou 730100, China

\* Corresponding author. ORCID: 0000-0002-8610-6599

E-mail address: [zhaocz1710@163.com](mailto:zhaocz1710@163.com)

Journal name: European Journal of Forest Research

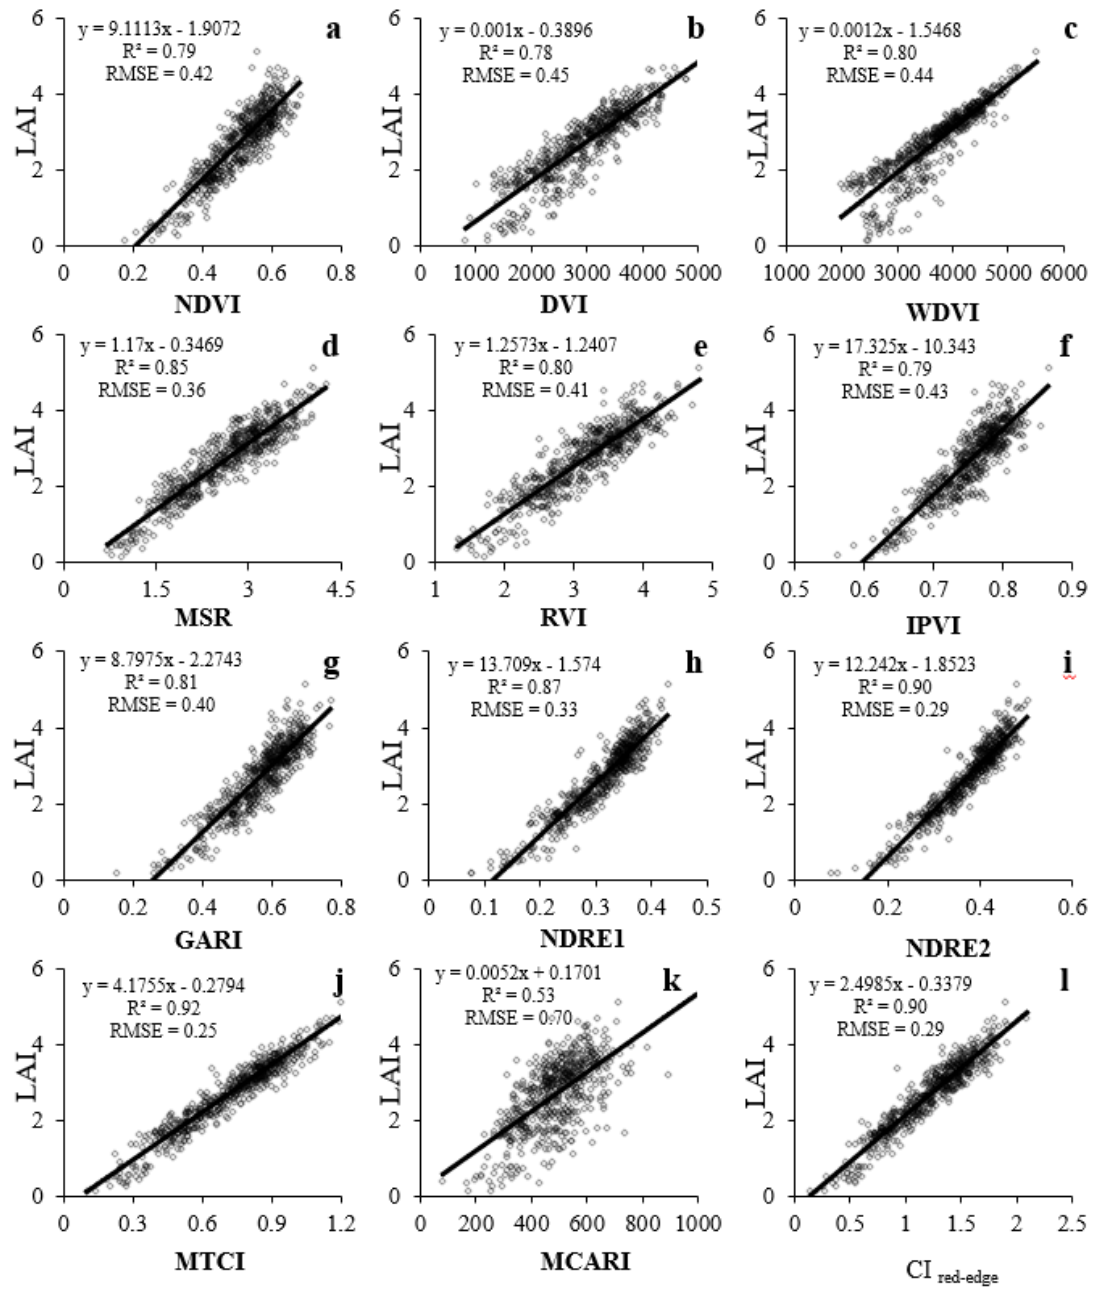

Online Resource 1: The predicted results of the model fit of the measured and predicted values of LAI: (a) NDVI; (b) DVI; (c) WDVI; (d) MSR; (e) RVI; (f) IPVI; (g) GARI; (h) NDRE1; (i) NDRE2; (j) MTCI; (k) MCARI; (l) CI<sub>red-edge</sub>.

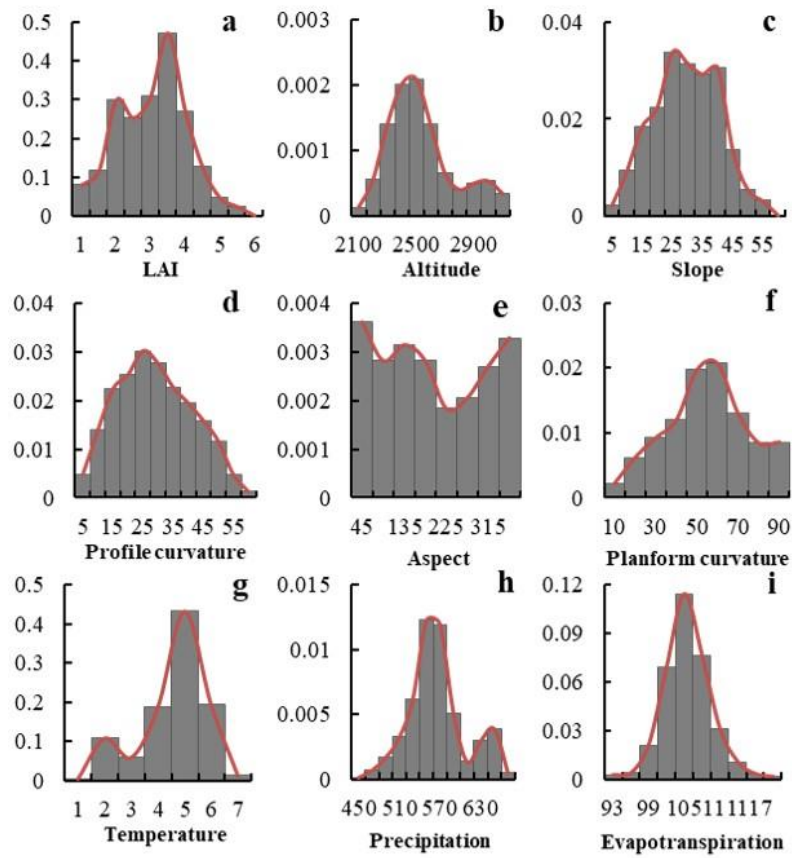

Online Resource 2: Frequency distribution histogram and density distribution curve of influencing factors: (a) LAI; (b) Altitude; (c) Slope; (d) PFC; (e) Aspect; (f) PLC; (g) T; (h) P; (i) ET.

Online Resource 3: GAM model hypothesis test results between LAI and single influencing factors

| Influencing factors | edf   | Ref.df | F      | P         | R <sup>2</sup> | Deviance explained |
|---------------------|-------|--------|--------|-----------|----------------|--------------------|
| Altitude            | 10.00 | 11.25  | 43.72  | <2e-16*** | 0.43           | 45.12%             |
| Slope               | 4.17  | 5.14   | 50.12  | <2e-16*** | 0.17           | 18.64%             |
| PFC                 | 2.68  | 3.37   | 19.93  | 0.002**   | 0.26           | 27.63%             |
| Aspect              | 3.73  | 4.63   | 59.29  | <2e-16*** | 0.31           | 32.16%             |
| PLC                 | 5.60  | 6.81   | 36.07  | 0.004**   | 0.19           | 20.43%             |
| T                   | 2.12  | 2.68   | 199.20 | <2e-16*** | 0.28           | 30.14%             |
| P                   | 11.32 | 11.82  | 39.05  | <2e-16*** | 0.36           | 38.78%             |
| ET                  | 7.07  | 8.31   | 157.90 | <2e-16*** | 0.23           | 25.74%             |

Note:edf: Estimated degree of freedom, Ref.df: Reference degree of freedom. “\*\*\*\*” significant at the 0.001 level , “\*\*\*” significant at the 0.01 level, “\*\*” significant at the 0.05 level, “.” significant at the 0.1 level.
